# Supplementary material
Source: MDPI journal article supplement (https://www.mdpi.com/2311-7524/9/3/394)
Supplement: s1 [file s1]

**Supplementary Table S1.** Cuticular wax constituents (% over total wax) identified in fruit cuticles isolated during ripening of irrigated (A) and non-irrigated (B) ‘Arbequina’ olives.**A. Irrigated**

| Sampling date         | Sept 18      | Oct 2        | Oct 16       | Oct 30       | Nov 13       | Nov 28       | Dec 11       | Jan 15       |
|-----------------------|--------------|--------------|--------------|--------------|--------------|--------------|--------------|--------------|
| <b>Fatty acids</b>    |              |              |              |              |              |              |              |              |
| C20:0                 | 1.25 ± 0.20  | 2.11 ± 0.27  | 2.75 ± 0.43  | 2.04 ± 0.30  | 2.09 ± 0.10  | 1.43 ± 0.06  | 1.40 ± 0.32  | 1.75 ± 0.25  |
| C20:1 (c13)           | 1.83 ± 0.22  | 1.83 ± 0.23  | 2.30 ± 0.33  | 1.87 ± 0.24  | 2.25 ± 0.06  | 1.48 ± 0.06  | 1.50 ± 0.32  | 1.80 ± 0.24  |
| C22:0                 | 0.57 ± 0.08  | 0.91 ± 0.09  | 1.05 ± 0.18  | 1.19 ± 0.21  | 1.20 ± 0.06  | 1.12 ± 0.08  | 1.38 ± 0.35  | 1.19 ± 0.18  |
| C24:0                 | 0.73 ± 0.02  | 1.19 ± 0.11  | 1.10 ± 0.17  | 1.70 ± 0.44  | 1.47 ± 0.09  | 1.25 ± 0.17  | 1.93 ± 0.50  | 1.85 ± 0.34  |
| C26:0                 | 2.03 ± 0.13  | 2.49 ± 0.37  | 2.14 ± 0.36  | 3.31 ± 0.44  | 2.90 ± 0.10  | 2.29 ± 0.29  | 2.90 ± 0.65  | 2.88 ± 0.39  |
| C28:0                 | 1.03 ± 0.06  | 1.03 ± 0.18  | 0.91 ± 0.09  | 1.37 ± 0.08  | 1.33 ± 0.04  | 1.13 ± 0.18  | 1.13 ± 0.22  | 1.15 ± 0.09  |
| <b>n-Alkanes</b>      |              |              |              |              |              |              |              |              |
| C25                   | 0.65 ± 0.06  | 0.64 ± 0.07  | 0.68 ± 0.17  | 0.53 ± 0.11  | 0.38 ± 0.01  | 0.43 ± 0.06  | 0.52 ± 0.05  | 0.26 ± 0.02  |
| C27                   | 0.37 ± 0.02  | 0.31 ± 0.05  | 0.37 ± 0.07  | 0.59 ± 0.11  | 0.66 ± 0.02  | 0.62 ± 0.05  | 0.61 ± 0.07  | 0.36 ± 0.04  |
| C34                   | nd           | nd           | 0.74 ± 0.15  | nd           | nd           | nd           | 0.26 ± 0.13  | 0.23 ± 0.04  |
| <b>Fatty alcohols</b> |              |              |              |              |              |              |              |              |
| C22                   | 0.36 ± 0.06  | 0.29 ± 0.04  | 0.35 ± 0.07  | 0.36 ± 0.05  | 0.37 ± 0.03  | 0.85 ± 0.06  | 0.65 ± 0.14  | 0.63 ± 0.11  |
| C24                   | 0.56 ± 0.07  | 0.79 ± 0.10  | 1.15 ± 0.23  | 1.64 ± 0.29  | 1.67 ± 0.06  | 2.58 ± 0.29  | 2.06 ± 0.42  | 1.38 ± 0.22  |
| C26                   | 1.78 ± 0.29  | 1.69 ± 0.28  | 1.68 ± 0.29  | 2.96 ± 0.56  | 2.39 ± 0.02  | 2.81 ± 0.51  | 2.24 ± 0.40  | 1.82 ± 0.26  |
| C28                   | 1.00 ± 0.13  | 0.82 ± 0.19  | 0.77 ± 0.13  | 1.17 ± 0.11  | 0.98 ± 0.02  | 1.13 ± 0.22  | 0.82 ± 0.18  | 0.69 ± 0.08  |
| <b>Sterols</b>        |              |              |              |              |              |              |              |              |
| Squalene              | 0.26 ± 0.03  | 0.14 ± 0.01  | 0.15 ± 0.02  | 0.13 ± 0.01  | 0.18 ± 0.04  | 0.15 ± 0.02  | 0.11 ± 0.01  | 0.08 ± 0.02  |
| β-sitosterol          | 0.63 ± 0.15  | 0.63 ± 0.16  | 1.00 ± 0.33  | 0.71 ± 0.09  | 0.58 ± 0.15  | 0.48 ± 0.13  | 0.54 ± 0.22  | 0.68 ± 0.02  |
| <b>Triterpenes</b>    |              |              |              |              |              |              |              |              |
| Oleanolic acid        | 21.01 ± 1.73 | 20.04 ± 0.74 | 20.17 ± 2.94 | 19.58 ± 0.66 | 18.06 ± 1.30 | 20.78 ± 1.47 | 23.25 ± 3.83 | 21.14 ± 0.50 |
| Ursolic acid          | nd           | 0.70 ± 0.30  | nd           | nd           | nd           | nd           | nd           | 0.38 ± 0.07  |
| Maslinic acid         | 50.66 ± 4.63 | 48.26 ± 3.10 | 45.01 ± 8.76 | 46.21 ± 3.81 | 48.54 ± 0.42 | 49.63 ± 5.00 | 44.15 ± 8.15 | 48.91 ± 3.54 |
| <b>Unidentified</b>   | 15.28 ± 1.51 | 16.13 ± 1.06 | 17.70 ± 3.11 | 14.62 ± 1.03 | 14.96 ± 0.74 | 11.83 ± 2.22 | 14.14 ± 1.62 | 12.82 ± 0.93 |

Values represent means of three replicates ± standard deviation (nd, non-detectable).

Supplementary Table S1 – Continued

**B. Rain-fed**

| Sampling date         | Sept 18      | Oct 2        | Oct 16       | Oct 30       | Nov 13       | Nov 28       | Dec 11       | Jan 15       |
|-----------------------|--------------|--------------|--------------|--------------|--------------|--------------|--------------|--------------|
| <b>Fatty acids</b>    |              |              |              |              |              |              |              |              |
| C20:0                 | 1.35 ± 0.14  | 1.73 ± 0.14  | 1.54 ± 0.28  | 1.84 ± 0.22  | 2.31 ± 0.18  | 1.06 ± 0.13  | 1.19 ± 0.16  | 1.32 ± 0.13  |
| C20:1 (c13)           | 1.27 ± 0.10  | 1.39 ± 0.12  | 1.23 ± 0.21  | 1.54 ± 0.17  | 2.20 ± 0.28  | 1.10 ± 0.15  | 1.73 ± 0.82  | 1.64 ± 0.12  |
| C22:0                 | 0.69 ± 0.05  | 1.03 ± 0.07  | 0.92 ± 0.15  | 1.36 ± 0.18  | 1.23 ± 0.18  | 0.93 ± 0.11  | 1.05 ± 0.17  | 1.17 ± 0.12  |
| C24:0                 | 0.95 ± 0.08  | 1.59 ± 0.10  | 1.39 ± 0.26  | 1.93 ± 0.20  | 1.36 ± 0.24  | 1.19 ± 0.27  | 1.37 ± 0.27  | 1.88 ± 0.09  |
| C26:0                 | 2.02 ± 0.15  | 3.20 ± 0.37  | 2.25 ± 0.31  | 2.21 ± 0.16  | 1.93 ± 0.38  | 1.59 ± 0.36  | 1.84 ± 0.29  | 2.81 ± 0.08  |
| C28:0                 | 0.82 ± 0.02  | 1.14 ± 0.16  | 0.78 ± 0.11  | 0.78 ± 0.06  | 0.76 ± 0.12  | 0.70 ± 0.13  | 0.77 ± 0.12  | 1.15 ± 0.07  |
| <b>n-Alkanes</b>      |              |              |              |              |              |              |              |              |
| C25                   | 0.90 ± 0.33  | 0.66 ± 0.04  | 0.40 ± 0.06  | 0.41 ± 0.05  | 0.47 ± 0.13  | 0.32 ± 0.03  | 0.43 ± 0.10  | 0.35 ± 0.13  |
| C27                   | 0.46 ± 0.36  | 0.41 ± 0.04  | nd           | nd           | nd           | nd           | nd           | nd           |
| C34                   | nd           | 1.32 ± 0.12  | nd           | nd           | nd           | nd           | 0.25 ± 0.02  | nd           |
| <b>Fatty alcohols</b> |              |              |              |              |              |              |              |              |
| C22                   | 0.34 ± 0.03  | 0.43 ± 0.06  | 0.23 ± 0.01  | 0.48 ± 0.14  | 0.38 ± 0.11  | 0.61 ± 0.14  | 0.37 ± 0.22  | 0.84 ± 0.11  |
| C24                   | 0.56 ± 0.01  | 0.89 ± 0.10  | 0.90 ± 0.18  | 1.48 ± 0.09  | 0.86 ± 0.18  | 1.73 ± 0.38  | 1.70 ± 0.18  | 1.98 ± 0.13  |
| C26                   | 2.03 ± 0.10  | 3.78 ± 0.62  | 2.16 ± 0.21  | 2.33 ± 0.12  | 1.78 ± 0.66  | 2.00 ± 0.53  | 1.61 ± 0.26  | 2.45 ± 0.18  |
| C28                   | 0.88 ± 0.01  | 1.52 ± 0.23  | 0.85 ± 0.03  | 0.75 ± 0.07  | 0.64 ± 0.20  | 0.73 ± 0.17  | 0.56 ± 0.10  | 0.87 ± 0.06  |
| <b>Sterols</b>        |              |              |              |              |              |              |              |              |
| Squalene              | 0.31 ± 0.10  | 0.15 ± 0.01  | 0.13 ± 0.01  | 0.19 ± 0.01  | 0.19 ± 0.05  | 0.17 ± 0.03  | 0.10 ± 0.02  | 0.10 ± 0.02  |
| β-sitosterol          | 0.61 ± 0.11  | 0.59 ± 0.22  | 0.51 ± 0.25  | 0.74 ± 0.07  | 0.57 ± 0.18  | 0.69 ± 0.09  | 0.66 ± 0.10  | 0.53 ± 0.08  |
| <b>Triterpenes</b>    |              |              |              |              |              |              |              |              |
| Oleanolic acid        | 22.84 ± 1.13 | 23.60 ± 0.76 | 22.53 ± 0.70 | 22.77 ± 2.04 | 21.08 ± 1.70 | 24.08 ± 1.39 | 22.77 ± 1.55 | 22.24 ± 0.81 |
| Ursolic acid          | nd           | nd           | nd           | nd           | 1.52 ± 0.61  | nd           | nd           | 0.37 ± 0.04  |
| Maslinic acid         | 47.00 ± 4.00 | 38.81 ± 4.31 | 49.49 ± 1.39 | 47.25 ± 3.95 | 48.05 ± 6.31 | 52.85 ± 4.58 | 49.49 ± 3.25 | 46.48 ± 4.01 |
| <b>Unidentified</b>   | 16.97 ± 2.40 | 18.83 ± 1.71 | 14.69 ± 0.60 | 13.94 ± 0.62 | 14.69 ± 2.77 | 10.25 ± 1.07 | 13.72 ± 0.82 | 13.57 ± 3.17 |

Values represent means of three replicates ± standard deviation (nd, non-detectable).

**Supplementary Table S2.** Cutin monomers (% over total cutin) identified in fruit cuticles isolated during ripening of irrigated (A) and non-irrigated (B) ‘Arbequina’ olives.**A. Irrigated**

| Sampling date                                                    | Sept 18      | Oct 2        | Oct 16       | Oct 30       | Nov 13       | Nov 28       | Dec 11       | Jan 15       |
|------------------------------------------------------------------|--------------|--------------|--------------|--------------|--------------|--------------|--------------|--------------|
| <b>Monocarboxylic fatty acids</b>                                |              |              |              |              |              |              |              |              |
| C16:0                                                            | 5.05 ± 0.02  | 4.70 ± 1.24  | 5.68 ± 0.74  | 4.68 ± 0.93  | 3.38 ± 0.32  | 2.59 ± 1.04  | 2.14 ± 0.25  | 2.77 ± 0.22  |
| C16:1 (c9)                                                       | 0.32 ± 1.63  | 0.36 ± 0.04  | 0.44 ± 0.09  | 0.44 ± 0.02  | 0.30 ± 0.02  | 0.24 ± 0.07  | 0.21 ± 0.03  | 0.29 ± 0.03  |
| C18:0                                                            | 2.12 ± 0.60  | 1.54 ± 0.64  | 2.12 ± 0.87  | 1.53 ± 0.82  | 1.11 ± 0.33  | 0.91 ± 0.45  | 0.69 ± 0.09  | 0.59 ± 0.05  |
| C18:1 (c9)                                                       | 10.02 ± 3.01 | 11.37 ± 1.98 | 14.48 ± 4.35 | 11.96 ± 1.30 | 9.45 ± 1.05  | 6.99 ± 2.51  | 6.68 ± 0.99  | 10.96 ± 1.03 |
| C18:1 (t9)                                                       | 0.54 ± 0.16  | 0.60 ± 0.11  | 0.72 ± 0.17  | 0.71 ± 0.05  | 0.51 ± 0.05  | 0.39 ± 0.13  | 0.34 ± 0.05  | 0.51 ± 0.05  |
| C18:2 (c9,c12)                                                   | 1.46 ± 0.76  | 1.66 ± 0.34  | 2.44 ± 0.62  | 2.49 ± 0.03  | 2.05 ± 0.17  | 1.62 ± 0.50  | 1.45 ± 0.18  | 2.36 ± 0.22  |
| C20:0                                                            | nd           |
| C20:1 (c13)                                                      | nd           |
| C22:0                                                            | 1.16 ± 0.05  | 1.34 ± 0.55  | 1.15 ± 0.37  | 1.40 ± 0.38  | 0.37 ± 0.02  | 0.31 ± 0.08  | 1.43 ± 0.40  | 1.58 ± 1.13  |
| C24:0                                                            | 0.69 ± 0.13  | 0.31 ± 0.09  | 0.28 ± 0.03  | 0.28 ± 0.04  | 0.41 ± 0.21  | 0.37 ± 0.12  | 0.26 ± 0.04  | 0.22 ± 0.00  |
| C26:0                                                            | nd           | nd           | nd           | nd           | nd           | nd           | 0.25 ± 0.05  | 0.29 ± 0.03  |
| <b>α,ω-Dicarboxylic fatty acids</b>                              |              |              |              |              |              |              |              |              |
| C16:0                                                            | 0.94 ± 0.24  | 1.11 ± 0.11  | 0.73 ± 0.13  | 1.01 ± 0.16  | 0.94 ± 0.21  | 0.86 ± 0.09  | 0.76 ± 0.01  | 0.85 ± 0.07  |
| C18:1 (c9)                                                       | 3.45 ± 0.30  | 8.23 ± 1.79  | 7.79 ± 1.05  | 9.72 ± 0.93  | 10.02 ± 0.15 | 10.29 ± 0.30 | 11.28 ± 0.27 | 11.37 ± 0.38 |
| <b>α,ω-Dicarboxylic fatty acids with mid-chain-hydroxy group</b> |              |              |              |              |              |              |              |              |
| C18:0 (9,10-diOH)                                                | 1.97 ± 0.32  | 1.14 ± 0.28  | 1.17 ± 0.35  | 0.99 ± 0.14  | 1.01 ± 0.28  | 1.93 ± 0.72  | 1.78 ± 0.23  | 1.20 ± 0.32  |
| <b>ω-Hydroxy fatty acids</b>                                     |              |              |              |              |              |              |              |              |
| C16:0                                                            | 7.06 ± 0.50  | 7.97 ± 0.78  | 6.97 ± 0.61  | 7.68 ± 0.56  | 7.75 ± 0.61  | 7.42 ± 0.19  | 7.06 ± 0.17  | 7.22 ± 0.40  |
| C18:0                                                            | 2.00 ± 2.13  | 1.63 ± 1.50  | 3.33 ± 0.18  | 2.78 ± 1.57  | 3.05 ± 1.05  | 3.51 ± 1.49  | 3.43 ± 0.61  | 2.24 ± 1.27  |
| C18:1 (c9)                                                       | 11.16 ± 0.43 | 15.33 ± 1.73 | 13.80 ± 1.05 | 15.51 ± 1.34 | 15.94 ± 0.25 | 14.52 ± 0.11 | 16.51 ± 0.36 | 17.08 ± 0.41 |
| C18:2 (c9,c12)                                                   | 2.73 ± 0.16  | 2.37 ± 0.24  | 2.02 ± 0.09  | 2.29 ± 0.53  | 2.33 ± 0.26  | 2.23 ± 0.22  | 1.99 ± 0.22  | 1.81 ± 0.08  |
| C20:0                                                            | 0.53 ± 0.22  | 0.45 ± 0.09  | 0.35 ± 0.07  | 0.37 ± 0.03  | 0.44 ± 0.03  | 0.32 ± 0.03  | 0.39 ± 0.03  | nd           |
| <b>ω-Hydroxy fatty acids with mid-chain-hydroxy group</b>        |              |              |              |              |              |              |              |              |
| C16:0 (9/10,16-diOH)                                             | 17.24 ± 3.02 | 10.78 ± 0.21 | 10.54 ± 0.61 | 8.40 ± 1.26  | 10.40 ± 1.57 | 16.20 ± 0.83 | 13.15 ± 1.25 | 10.16 ± 2.30 |
| C18:0 (9,10,18-triOH)                                            | 2.15 ± 0.54  | 1.70 ± 0.21  | 1.59 ± 0.13  | 1.88 ± 0.10  | 1.44 ± 0.63  | 1.98 ± 0.33  | 1.82 ± 0.03  | 1.44 ± 0.14  |
| <b>α-Hydroxy fatty acids</b>                                     |              |              |              |              |              |              |              |              |
| C22:0 (2-OH)                                                     | 1.25 ± 0.63  | 0.63 ± 0.32  | 0.82 ± 0.18  | 0.80 ± 0.09  | 0.88 ± 0.22  | 1.73 ± 0.92  | 1.23 ± 0.65  | 1.19 ± 0.81  |

**Other hydroxy fatty acids**

|                       |              |              |              |              |              |              |              |              |
|-----------------------|--------------|--------------|--------------|--------------|--------------|--------------|--------------|--------------|
| C18:1 (c9, 17-OH)     | nd           |
| <b>Fatty alcohols</b> |              |              |              |              |              |              |              |              |
| C24                   | 0.77 ± 0.27  | 0.53 ± 0.13  | 0.64 ± 0.14  | 0.66 ± 0.00  | 0.79 ± 0.09  | 1.07 ± 0.27  | 0.93 ± 0.15  | 0.98 ± 0.16  |
| C26                   | 0.73 ± 0.08  | 0.81 ± 0.04  | 0.80 ± 0.06  | 0.94 ± 0.08  | 0.83 ± 0.11  | 0.87 ± 0.09  | 0.97 ± 0.09  | 1.09 ± 0.05  |
| C28                   | 0.32 ± 0.05  | 0.29 ± 0.01  | 0.25 ± 0.02  | 0.31 ± 0.01  | 0.43 ± 0.30  | 0.29 ± 0.04  | 0.28 ± 0.00  | 0.32 ± 0.03  |
| <b>Unidentified</b>   | 26.34 ± 0.53 | 25.14 ± 1.14 | 21.86 ± 1.53 | 23.18 ± 0.70 | 26.17 ± 1.40 | 23.36 ± 0.70 | 24.98 ± 0.67 | 23.48 ± 0.60 |

Values represent means of three replicates ± standard deviation (nd, non-detectable).

Supplementary Table S2 – Continued

**B. Rain-fed**

| Sampling date                                                    | Sept 18      | Oct 2        | Oct 16       | Oct 30       | Nov 13       | Nov 28       | Dec 11       | Jan 15       |
|------------------------------------------------------------------|--------------|--------------|--------------|--------------|--------------|--------------|--------------|--------------|
| <b>Monocarboxylic fatty acids</b>                                |              |              |              |              |              |              |              |              |
| C16:0                                                            | 2.95 ± 0.96  | 3.80 ± 1.41  | 4.86 ± 0.70  | 4.05 ± 1.79  | 3.14 ± 0.51  | 2.18 ± 0.49  | 2.12 ± 0.32  | 2.08 ± 0.32  |
| C16:1 (c9)                                                       | 0.27 ± 0.01  | 0.25 ± 0.04  | 0.25 ± 0.02  | 0.22 ± 0.02  | 0.26 ± 0.03  | 0.20 ± 0.02  | 0.23 ± 0.04  | 0.24 ± 0.02  |
| C18:0                                                            | 1.40 ± 0.98  | 1.43 ± 0.93  | 2.55 ± 0.73  | 2.07 ± 1.30  | 1.22 ± 0.29  | 1.06 ± 0.39  | 0.56 ± 0.07  | 0.47 ± 0.21  |
| C18:1 (c9)                                                       | 6.08 ± 0.39  | 7.77 ± 1.37  | 9.24 ± 0.04  | 6.43 ± 0.67  | 8.42 ± 0.93  | 4.79 ± 0.49  | 6.79 ± 1.11  | 8.53 ± 0.70  |
| C18:1 (t9)                                                       | 0.29 ± 0.02  | 0.38 ± 0.09  | 0.41 ± 0.01  | 0.32 ± 0.03  | 0.45 ± 0.07  | 0.25 ± 0.02  | 0.36 ± 0.07  | 0.40 ± 0.02  |
| C18:2 (c9,c12)                                                   | 0.85 ± 0.08  | 1.32 ± 0.15  | 1.69 ± 0.10  | 1.56 ± 0.13  | 1.77 ± 0.17  | 1.40 ± 0.11  | 1.70 ± 0.35  | 1.88 ± 0.18  |
| C20:0                                                            | nd           |
| C20:1 (c13)                                                      | nd           |
| C22:0                                                            | 1.06 ± 0.05  | 1.19 ± 0.34  | 0.70 ± 0.33  | 1.38 ± 0.40  | 0.77 ± 0.44  | 1.33 ± 0.48  | 1.10 ± 0.61  | 1.56 ± 1.11  |
| C24:0                                                            | 0.54 ± 0.17  | 0.29 ± 0.01  | 0.25 ± 0.08  | 0.24 ± 0.02  | 0.36 ± 0.03  | 0.31 ± 0.09  | 0.22 ± 0.08  | 0.24 ± 0.05  |
| C26:0                                                            | nd           | nd           | nd           | nd           | 0.23 ± 0.05  | 0.24 ± 0.04  | 0.22 ± 0.07  | 0.29 ± 0.02  |
| <b>α,ω-Dicarboxylic fatty acids</b>                              |              |              |              |              |              |              |              |              |
| C16:0                                                            | 0.78 ± 0.10  | 0.87 ± 0.04  | 0.70 ± 0.08  | 0.61 ± 0.05  | 0.72 ± 0.14  | 0.85 ± 0.10  | 0.67 ± 0.09  | 0.75 ± 0.16  |
| C18:1 (c9)                                                       | 6.59 ± 0.93  | 9.56 ± 0.18  | 9.97 ± 1.09  | 9.22 ± 0.51  | 8.74 ± 0.32  | 10.82 ± 1.46 | 8.45 ± 0.67  | 10.25 ± 1.71 |
| <b>α,ω-Dicarboxylic fatty acids with mid-chain-hydroxy group</b> |              |              |              |              |              |              |              |              |
| C18:0 (9,10-diOH)                                                | 2.00 ± 0.55  | 1.68 ± 0.14  | 1.66 ± 0.06  | 2.05 ± 0.10  | 1.51 ± 0.16  | 1.68 ± 0.92  | 1.90 ± 0.13  | 1.42 ± 0.45  |
| <b>ω-Hydroxy fatty acids</b>                                     |              |              |              |              |              |              |              |              |
| C16:0                                                            | 7.05 ± 1.16  | 7.27 ± 0.70  | 6.68 ± 0.28  | 5.80 ± 0.12  | 6.81 ± 0.47  | 7.77 ± 0.61  | 6.74 ± 0.77  | 6.38 ± 0.74  |
| C18:0                                                            | 3.50 ± 0.06  | 2.10 ± 1.00  | 2.50 ± 1.51  | 2.94 ± 1.16  | 3.96 ± 0.12  | 2.32 ± 2.64  | 3.25 ± 0.87  | 2.22 ± 1.11  |
| C18:1 (c9)                                                       | 13.88 ± 2.21 | 16.45 ± 0.07 | 15.68 ± 1.36 | 15.45 ± 0.98 | 14.57 ± 0.76 | 17.07 ± 2.65 | 13.24 ± 1.27 | 16.30 ± 2.13 |
| C18:2 (c9,c12)                                                   | 2.05 ± 0.07  | 2.03 ± 0.05  | 2.19 ± 0.05  | 2.06 ± 0.40  | 2.11 ± 0.28  | 2.30 ± 0.47  | 2.28 ± 0.35  | 1.94 ± 0.09  |
| C20:0                                                            | 0.58 ± 0.03  | 0.41 ± 0.03  | 0.44 ± 0.03  | 0.41 ± 0.10  | 0.37 ± 0.10  | 0.28 ± 0.04  | 0.37 ± 0.07  |              |
| <b>ω-Hydroxy fatty acids with mid-chain-hydroxy group</b>        |              |              |              |              |              |              |              |              |
| C16:0 (9/10,16-diOH)                                             | 14.63 ± 3.15 | 12.43 ± 1.67 | 8.98 ± 0.41  | 11.01 ± 1.37 | 13.36 ± 1.74 | 13.20 ± 4.48 | 18.37 ± 2.20 | 13.07 ± 3.91 |
| C18:0 (9,10,18-triOH)                                            | 2.34 ± 0.27  | 1.78 ± 0.17  | 1.77 ± 0.14  | 2.68 ± 0.23  | 1.97 ± 0.05  | 1.60 ± 0.20  | 1.93 ± 0.13  | 1.82 ± 0.22  |
| <b>α-Hydroxy fatty acids</b>                                     |              |              |              |              |              |              |              |              |
| C22:0 (2-OH)                                                     | 1.48 ± 0.13  | 0.75 ± 0.30  | 0.88 ± 0.49  | 1.39 ± 0.13  | 1.66 ± 0.14  | 1.12 ± 0.18  | 1.27 ± 0.40  | 1.26 ± 0.69  |
| <b>Other hydroxy fatty acids</b>                                 |              |              |              |              |              |              |              |              |
| C18:1 (c9, 17-OH)                                                | nd           |

**Fatty alcohols**

|                     |              |              |              |              |              |              |              |              |
|---------------------|--------------|--------------|--------------|--------------|--------------|--------------|--------------|--------------|
| C24                 | 1.05 ± 0.05  | 0.60 ± 0.06  | 0.71 ± 0.04  | 0.90 ± 0.19  | 0.99 ± 0.13  | 1.03 ± 0.00  | 1.01 ± 0.15  | 1.11 ± 0.22  |
| C26                 | 0.80 ± 0.11  | 0.86 ± 0.05  | 0.88 ± 0.14  | 0.99 ± 0.08  | 0.93 ± 0.11  | 0.87 ± 0.04  | 0.89 ± 0.15  | 0.91 ± 0.09  |
| C28                 | 0.23 ± 0.01  | 0.27 ± 0.03  | 0.25 ± 0.03  | 0.27 ± 0.01  | 0.28 ± 0.04  | 0.26 ± 0.02  | 0.26 ± 0.03  | 0.27 ± 0.05  |
| <b>Unidentified</b> | 29.58 ± 2.12 | 26.52 ± 0.79 | 26.76 ± 1.80 | 27.97 ± 0.62 | 25.41 ± 0.86 | 27.03 ± 1.34 | 26.08 ± 0.47 | 26.62 ± 1.28 |

Values represent means of three replicates ± standard deviation (nd, non-detectable).

| Picking | Date    | Irrigated                                                                           | Rain-fed                                                                              |
|---------|---------|-------------------------------------------------------------------------------------|---------------------------------------------------------------------------------------|
| 1       | Sept 18 |    |    |
| 2       | Oct 3   |    |    |
| 3       | Oct 16  |   |   |
| 4       | Oct 30  |  |   |
| 5       | Nov 13  |  |  |

**Supplementary Figure S1.** Toluidine Blue (TB) staining during ripening of irrigated and non-irrigated ‘Arbequina’ olives.

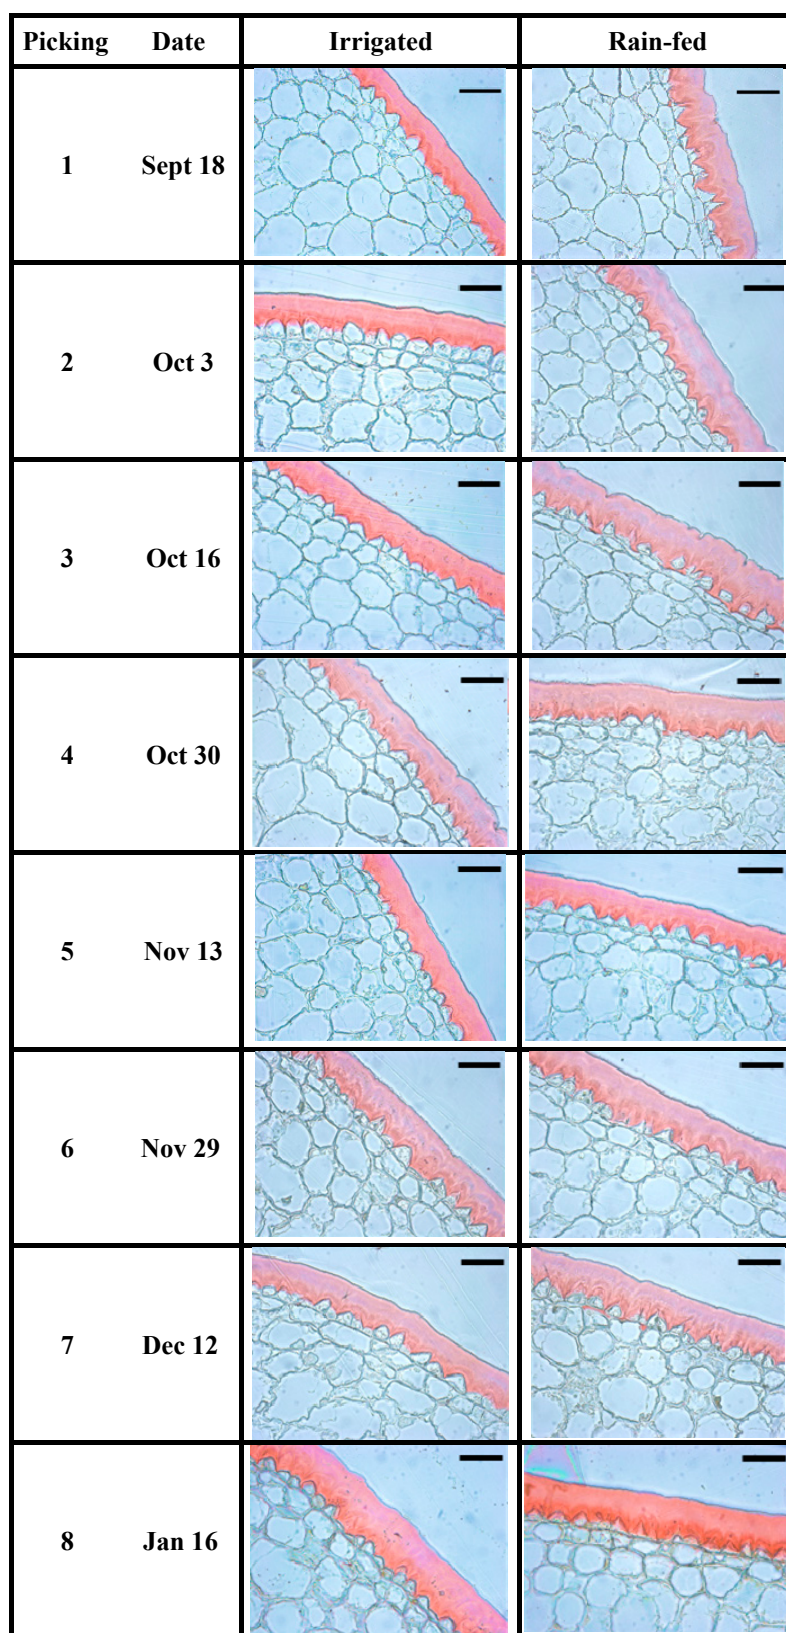

**Supplementary Figure S2.** Sudan IV-stained pericarp cross-sections observed under bright-field microscopy during ripening of irrigated and non-irrigated ‘Arbequina’ olives. Scale bars indicate 60  $\mu\text{m}$ .
